# Supplementary material
Source: PubMed Central journal article supplement (PMC8195585)
Supplement: 6912_Appendix.pdf [file 6912_Appendix.pdf]

**APPENDIX**

| <b>Supplementary Table 1. Univariate associations between selected variables and depression across the full sample</b> |                  |         |                  |         |
|------------------------------------------------------------------------------------------------------------------------|------------------|---------|------------------|---------|
| Predictor variable                                                                                                     | New diagnosis    |         | To start ADT     |         |
|                                                                                                                        | OR               | p       | OR               | p       |
| Age (10-year decrease)                                                                                                 | 1.20 (1.00–1.40) | 0.047   | 1.31 (1.05–1.58) | 0.018   |
| Education                                                                                                              |                  |         |                  |         |
| Primary school                                                                                                         | 1.65 (1.07–2.54) | 0.023   | 1.64 (0.96–2.83) | 0.073   |
| Secondary school                                                                                                       | 1.18 (0.83–1.68) | 0.35    | 1.06 (0.65–1.74) | 0.82    |
| >Secondary school                                                                                                      | Ref              |         | Ref              |         |
| Tobacco use                                                                                                            |                  |         |                  |         |
| Never                                                                                                                  | Ref              |         | Ref              |         |
| Current                                                                                                                | 3.13 (2.02–4.84) | <0.001  | 2.81 (1.50–5.24) | 0.001   |
| Former                                                                                                                 | 1.30 (0.92–1.83) | 0.14    | 1.27 (0.79–2.03) | 0.33s   |
| Alcohol                                                                                                                |                  |         |                  |         |
| Never                                                                                                                  | Ref              |         | Ref              |         |
| Current                                                                                                                | 1.20 (0.70–2.05) | 0.51    | 1.32 (0.62–2.83) | 0.47    |
| Former                                                                                                                 | 3.24 (1.76–5.98) | <0.0001 | 2.19 (0.62–2.83) | 0.078   |
| Employed                                                                                                               | 1.01 (0.74–1.38) | 0.94    | 0.95 (0.60–1.49) | 0.81    |
| Poor performance status (ECOG >1)                                                                                      | 5.48 (3.91–7.70) | <0.001  | 5.35 (3.40–8.44) | <0.0001 |
| Gleason score                                                                                                          |                  |         |                  |         |
| 6 or 3+4                                                                                                               | Ref              |         | Ref              |         |
| 4+3 or higher                                                                                                          | 1.38 (1.01–1.88) | 0.041   | 0.87 (0.52–1.46) | 0.61    |
| Metastatic disease                                                                                                     | 1.56 (0.93–2.61) | 0.094   | 1.14 (0.68–1.92) | 0.63    |
| Pre-existing history of depression or anxiety                                                                          | 3.64 (2.55–5.21) | <0.0001 | 3.89 (2.34–6.47) | <0.0001 |
| BMI $\geq$ 30 kg/m <sup>2</sup>                                                                                        | 1.41 (0.92–2.16) | 0.12    | 1.32 (0.96–1.81) | 0.090   |
| Erectile dysfunction (IIEF score >22)                                                                                  | 1.45 (0.86–2.45) | 0.17    | 2.19 (0.62–7.73) | 0.22    |
| Multiple medical comorbidities                                                                                         | 1.90 (1.27–2.84) | 0.002   | 1.30 (0.77–2.20) | 0.32    |

ADT: androgen deprivation therapy; BMI: body mass index; ECOG: Eastern Cooperative Oncology Group Performance Status Score; IIEF: International Index of Erectile Function; OR: odds ratio; PC: prostate cancer.
